# Supplementary material for: Vitamin D Protects against Traumatic Brain Injury via Modulating TLR4/MyD88/NF-κB Pathway-Mediated Microglial Polarization and Neuroinflammation
Source: PubMed Central journal article supplement (PMC9307360; doi:10.1155/2022/3363036), 2022-07-15

**A**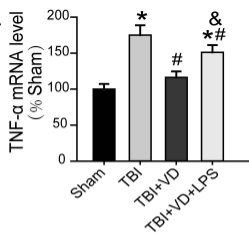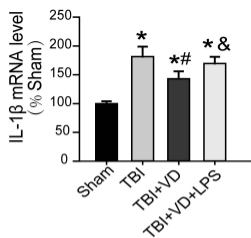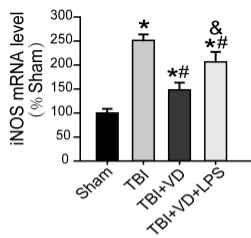**B**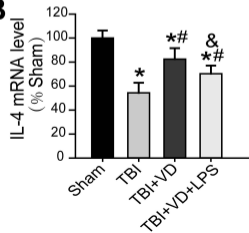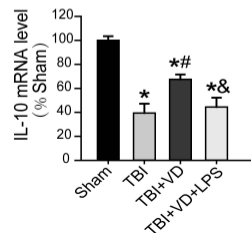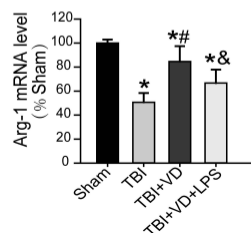**C**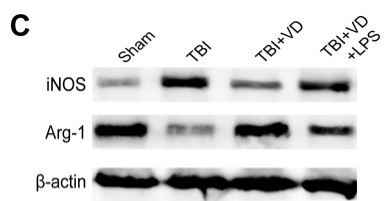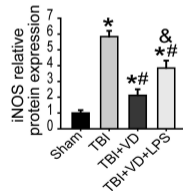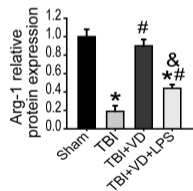

Supplement: 3363036.f1.pdf [file 3363036.f1.pdf]
